# Supplementary material
Source: ML conference proceedings conference paper supplement (https://openaccess.thecvf.com/content/WACV2024/html/Li_PromptAD_Zero-Shot_Anomaly_WACV_2024_paper.html)
Supplement: Supplementary file 1 [file Li_PromptAD_Zero-Shot_Anomaly_WACV_2024_supplemental.pdf]

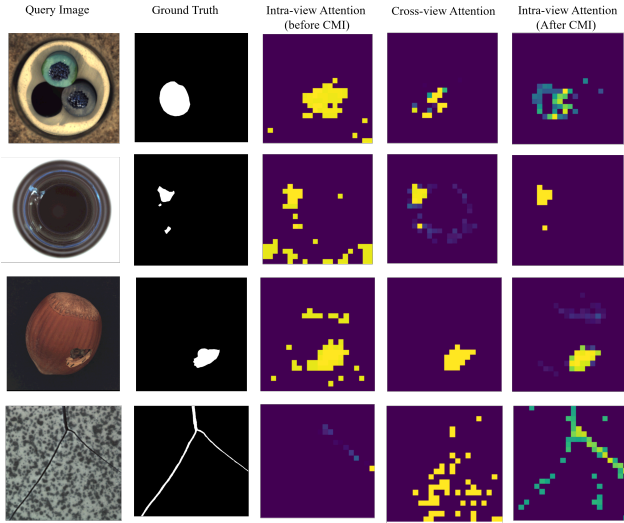

Figure 6. Qualitative anomaly localization results for the proposed Cross-view Mutual Interaction (CMI) module on MVTec AD dataset. For each example, the images from left to right are the anomaly image, the ground-truth mask, the anomaly score map produced by the abnormality branch and normality branch, and the fused score map.

## 6. Visualization Results of Cross-view Mutual Interaction

As the two branches capture complementary information, abnormality branch is more discriminative for typical anomaly classes that are precisely defined, while normality branch is more generalized to unseen anomaly classes. To validate that the attention learned by one branch is helpful to discover missing anomalies in the other, we visualize the attention maps obtained from middle layers of each branch. As shown in Figure 6, the intermediate attention maps of the ABN branch to highlight anomaly regions that are missed by the NOR branch, so that the NOR branch can better localize the anomaly from the areas of the image that the its own attention does not focus on.

## 7. Visualization Results of Cross-view Learning

We further investigate the importance of cross-view learning by removing it from our framework. The localization results are presented in Figure 7, where we denote the cross-view learning strategy as CVL. As we can see, simply adopting the single-view training without any constraint leads to poor generalization performance due to semantic confusion. In contrast, CVL alleviates this issue.

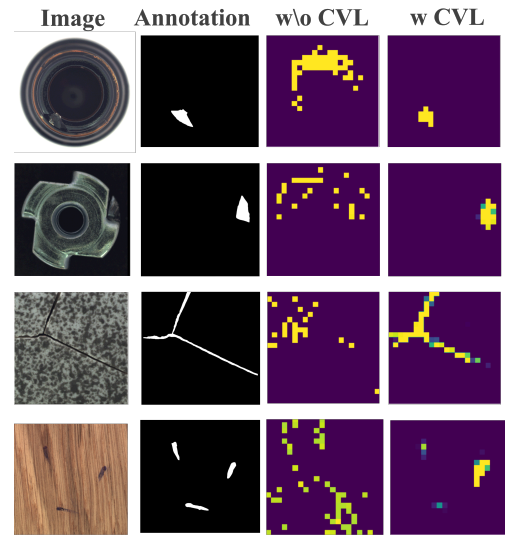

Figure 7. Qualitative anomaly localization results for the proposed Cross-view Learning (CVL) approach on MVTec AD dataset.

## 8. Examples of Text Prompts

### 8.1. Abnormality Prompts

1. **Bottle** A photo of a anomalous bottle for visual inspection with the following appearance: Broken Large: Major fracture, sizable crack.; Broken Small: Minor break, tiny split.; Contamination: Impurity, foreign matter.
2. **Cable** A photo of a anomalous cable for visual inspection with the following appearance: Bent Wire: Curved strand, misshapen conductor.; Cable Swap: Misarranged cords, switched lines.; Cut Insulation: Sliced sheath, exposed core.; Missing Cable: Absent cord, lacking wire.; Missing Wire: Omitted strand, nonexistent conductor. ; Poke Insulation: Indentation in sheath, depression in covering.
3. **Capsule** A photo of a anomalous capsule for visual inspection with the following appearance: Crack: Fracture, fissure.; Faulty Imprint: Blurred marking, smeared print.; Poke: Indentation, depression.; Scratch: Scuff, abrasion.; Squeeze: Compression, deformation.
4. **Carpet** A photo of a anomalous carpet for visual inspection with the following appearance: Color: Discoloration, uneven shade ; Cut: Gash, tear ; Hole: Opening, puncture ; Metal Contamination: Metallic intrusion, metal presence ; Thread: Stray fiber, loose yarn.
5. **Grid** A photo of a anomalous grid for visual inspection

tion with the following appearance: Bent: Warped, distorted ; Broken: Fractured, cracked ; Glue: Adhesive, stickiness ; Thread: Fiber, strand ; Metal Contamination: Metallic impurity, foreign metal.

6. **Hazelnut** A photo of a anomalous hazelnut for visual inspection with the following appearance: Crack: Fissure, split ; Cut: Incision, gash ; Hole: Gap, cavity ; Print: Mark, imprint.
7. **Leather** A photo of a anomalous leather for visual inspection with the following appearance: Color: Hue variation, discoloration ; Cut: Slit, incision ; Fold: Crease, wrinkle ; Glue: Adhesive, stickiness ; Poke: Indentation, dent.
8. **Metal nut** A photo of a anomalous metal nut for visual inspection with the following appearance: Bent: Warped, misshapen ; Color: Discoloration, hue shift ; Flip: Inverted, reversed ; Scratch: Scrape, abrasion.
9. **Pill** A photo of a anomalous pill for visual inspection with the following appearance: Color: Hue variation, discoloration ; Crack: Fracture, split ; Faulty Imprint: Misprint, distorted marking ; Pill Type: Form discrepancy, shape variation ; Scratch: Scuff, abrasion; Contamination: Impurity, foreign matter.
10. **Screw** A photo of a anomalous screw for visual inspection with the following appearance: Manipulated Front: Altered tip, modified point;Scratch Head: Scuffed cap, abraded top ; Scratch Neck: Scored shaft, marred stem;Thread Side: Groove damage, side indentation.;Thread Top: Worn crest, peak abrasion.
11. **Tile** A photo of a anomalous tile for visual inspection with the following appearance: Crack: Fissure, fracture ; Rough: Coarse, uneven ; Glue Strip: Adhesive band, stickiness ; Gray Stroke: Ashen mark, smoky trace ; Oil: Grease, slickness.
12. **Toothbrush** A photo of a anomalous toothbrush for visual inspection with the following appearance: Defective: Flawed, malfunctioning, imperfect, faulty.
13. **Transistor** A photo of a anomalous transistor for visual inspection with the following appearance: Bent Lead: Curved pin, twisted leg.;Cut Lead: Severed wire, clipped terminal.;Damaged Case: Cracked housing, broken shell.;Misplaced: Misaligned, off-center.
14. **Wood** A photo of a anomalous wood for visual inspection with the following appearance: Color: Discoloration, shade difference ; Hole: Gap, cavity ; Liquid: Fluid, moisture ; Scratch: Scuff, abrasion.

15. **Zipper** A photo of a anomalous zipper for visual inspection with the following appearance: Broken Teeth: Fractured cogs, damaged notches ; Fabric Border: Edge cloth, hem perimeter ; Fabric Interior: Inner textile, core material ; Rough: Coarse, uneven ; Split Teeth: Divided cogs, bifurcated notches ; Squeezed Teeth: Compressed cogs, compacted notches.

## 8.2. Normality Prompts

1. **Bottle** A photo of a normal bottle for visual inspection with the following appearance: round brown glass bottle neck with a black hole in the middle
2. **Cable** A photo of a normal cable for visual inspection with the following appearance: an insulated wire or wires having a protective casing, without black holes or bent wires or missing wires
3. **Capsule** A photo of a normal capsule for visual inspection with the following appearance: a round or cylindrical protective container
4. **Carpet** A photo of a normal carpet for visual inspection with the following appearance: a thick, woven floor covering
5. **Grid** A photo of a normal grid for visual inspection with the following appearance: a reticular structure formed by supporting plates joined orthogonally by transverse elements.
6. **Hazelnut** A photo of a normal hazelnut for visual inspection with the following appearance: round, smooth and pointed body, with a hard brown shell, stripes lined toward the pointed head
7. **Leather** A photo of a normal leather for visual inspection with the following appearance: brown leather surface, clean and smooth
8. **Metal nut** A photo of a normal metal nut for visual inspection with the following appearance: a sliver plate with a round hole in the middle, four anticlockwise squamas, similar to gear
9. **Pill** A photo of a normal pill for visual inspection with the following appearance: a small round or cylindrical pill with white surface, without fissure or crack
10. **Screw** A photo of a normal screw for visual inspection with the following appearance: a short metal pin with a helical thread running round it and a slotted head
11. **Tile** A photo of a normal tile for visual inspection with the following appearance: a thin rectangular slab of baked clay

12. **Toothbrush** A photo of a normal toothbrush for visual inspection with the following appearance: a small brush with a head of tightly clustered bristles or hair or wires
13. **Transistor** A photo of a normal transistor for visual inspection with the following appearance: black head and three leads, the left lead and right lead is longer than the middle lead
14. **Wood** A photo of a normal wood for visual inspection with the following appearance: smooth and clean wood surface with straight or spiral or curved or interlocked texture
15. **Zipper** A photo of a normal zipper for visual inspection with the following appearance: metal or plastic teeth on strips of tape and a sliding piece
